# Supplementary material
Source: PubMed Central journal article supplement (PMC3615554)
Supplement: NIHMS455076-supplement-01.pdf [file NIHMS455076-supplement-01.pdf]

**Ms. No.: JBSC-12-0035**

**Title:** A High-Content Biosensor Based Screen Identifies Cell Permeable Activators and Inhibitors of EGFR Function: Implications in Drug Discovery

**Authors:** Christophe Antczak, Jeni P. Mahida, Bhavneet Bhinder, Paul Calder, and Hakim Djaballah

**Corresponding Author:** Dr. Hakim Djaballah

## **Supplementary methods**

### **Microscopy image acquisition and analysis**

Cell images in 384-well format were acquired using the IN Cell Analyzer 2000 (INCA2000) automated microscope as previously described.<sup>8</sup> Briefly, 4 images per well were collected at 20X objective magnification using a 20x ASAC objective (0.45NA). GFP images of granule formation were acquired at 490/20 nm excitation and 525/36 nm emission with a 1.2 second exposure time. DRAQ5 images of stained nuclei were acquired at 645/30 nm excitation and 705/72 nm emission with a 0.6 second exposure time. GFP granules and nuclei were identified using object-based segmentation on each channel using a customized image analysis protocol in Developer Toolbox 1.7 software (GE Healthcare, Piscataway, NJ). Automated image analysis using our custom protocol yielded granule and nuclei count that were used for the quantification of EGFR activity and cell count, respectively.

### **Chemical libraries**

The library used for the screen combines 6,912 chemicals obtained from MicroSource, Prestwick, Tocris, Sigma-Aldrich and other commercial sources as previously described.<sup>9</sup> Briefly, the MicroSource Library contains 2,000 biologically active and structurally diverse compounds from known drugs, experimental bioactives, and pure natural products. The Prestwick Chemical Library is a unique collection of 1,119 bioactive chemical compounds, all

off patent and selected for structural diversity and broad spectrum. Approximately 90% of the library consists of marketed drugs and 10% of bioactive alkaloids or related substances. The Tocris collection includes 1,280 high purity compounds active at GPCRs, kinases, ion channels, nuclear receptors and transporters. The LOPAC<sup>1280</sup> library from Sigma-Aldrich consists of 1,280 well-characterized, high-purity compounds representing all major target classes.

### **Confirmation of positives using the EGFRB assay**

Positives selected from the pilot screen were resupplied from vendors and their activity was confirmed in dose response studies using 12 doubling dilutions in duplicate with a 10  $\mu$ M and 1  $\mu$ M compound concentration as the upper limit. Controls were identical as those used in screening plates and consisted of 1% DMSO (v/v) (high control) and 10  $\mu$ M gefitinib in 1% DMSO (v/v) (low control). The assay was performed according to the same workflow used for control run and screening. Following automated image analysis, dose response data files were uploaded onto the HTS Core Screening Data Management System for curve fitting and IC<sub>50</sub> calculation.

### **Assessment of compound optical interference**

The potential optical interference of selected initial positives from the screen in the GFP channel was assessed in white 384 well microtiter plates (Corning #3570, Corning, NY) by measuring the fluorescence intensity of wells containing 45  $\mu$ L PBS, pre- and post-addition of 5  $\mu$ L of the resupplied compounds in solution in 10% DMSO (v/v) with a PP-384-M Personal Pipettor (Apricot Designs, Monrovia, CA) using a LEADseeker<sup>TM</sup> multimodality imaging system (GE Healthcare, Piscataway, NJ) equipped with fluorescein excitation, emission and dichroic

filters. Each compound was tested in dose response using 12 doubling dilutions in triplicate with a 10  $\mu$ M compound concentration in 1% DMSO (v/v) as the upper limit. Compounds inducing a dose-dependent increase in fluorescence post- versus pre-addition were flagged as autofluorescent and potentially interfering with the GFP granule readout. In addition, A549 parental cells were imaged in the GFP channel after treatment with the identified activators of granule formation in the same conditions as A549-EGFRB cells to rule out the possibility that the observed increase in granule results from compound auto-fluorescence.

### **Assessment of compound solubility limit**

The solubility limit of selected initial positives from the screen was assessed in UV-transparent 384 well microtiter plates (#781801, Greiner Bio-One, Monroe, NC) using a NEPHELOstar microplate laser nephelometer (BMG LABTECH GmbH, Ortenberg, Germany). The turbidity of wells containing 45  $\mu$ L PBS was measured pre- and post-addition of 5  $\mu$ L of the resupplied compounds in solution in 10% DMSO (v/v) with the PP-384-M Personal Pipettor. Each compound was tested in dose response using 12 doubling dilutions in triplicate with a 10  $\mu$ M compound concentration in 1% DMSO (v/v) as the upper limit. Controls consisted of standards of 0.1, 1, 10, 20, 100, 200, 800 and 1,000 Nephelometric Turbidity Units (Hach, Loveland, CO). The compound solubility limit was defined as the compound concentration yielding turbidity values greater than the average turbidity values for the 100 NTU standard. Compounds with a solubility limit lower than 10  $\mu$ M in 1% DMSO (v/v) could potentially interfere with the EGFRB assay due to low solubility in the conditions of the assay.

## FIGURES & TABLE LEGENDS

### **Supplementary Figure 1. Dose response of confirmed positives in the EGFRB assay**

**A)** Dose response studies of ZM-306416 result in a calculated  $IC_{50}$  of  $0.67 \pm 0.2 \mu\text{M}$  for granule count formation and no effect on cell number. Representative images at 0.04, 0.6 and 10, 0.6 and 10  $\mu\text{M}$  show a decrease in granule formation without any observed cytotoxicity effects. **B)** Dose response studies of flurandrenolide resulted in a calculated  $EC_{50}$  of  $0.023 \pm 0.02 \mu\text{M}$  for granule count and no effect on cell number. Representative images at 0.04, 0.6 and 10, 0.6 and 10  $\mu\text{M}$  show an increase in granule formation without any cytotoxicity or increase in cell number. **A)** and **B)** Granule segmentation resulting from automated image analysis is overlaid on images in yellow.

### **Supplementary Table 1. Performance of the 82 inhibitors of granule formation identified in the EGFR biosensor screen.**

The compound name, supplier, described biological property, performance in the EGFRB assay and in the follow up confirmatory workflow is summarized for the 82 inhibitors of granule formation identified in the EGFR biosensor screen. O.I.: optical interference. sol.: solubility limit. HTS %I GRAN: percentage inhibition in granule count in the EGFRB assay during the screen. HTS %I NUC: percentage inhibition in nuclei count in the EGFRB assay during the screen.

### **Supplementary Table 2. Performance of the 66 activators of granule formation identified in the EGFR biosensor screen.**

The compound name, supplier, described biological property, performance in the EGFRB assay and in the follow up confirmatory workflow is summarized for the 66 activators of granule formation identified in the EGFR biosensor screen. O.I.: optical interference. sol.: solubility limit. HTS %I GRAN: percentage inhibition in granule count in the EGFRB assay during the screen. HTS %I NUC: percentage inhibition in nuclei count in the EGFRB assay during the screen.

**Supplementary Table 3. Chemical structure, image and summary table of data in the EGFRB assay of the 16 hits and the erbstatin analog**

The chemical structure, representative image out of 4 fields imaged during the screen and summary table of data performance of 16 confirmed positives from the EGFR biosensor screen and of the described EGFR kinase inhibitor erbstatin analog included in the confirmation studies is summarized. Granule segmentation resulting from automated image analysis is overlaid on images in yellow.

**A****ZM-306416**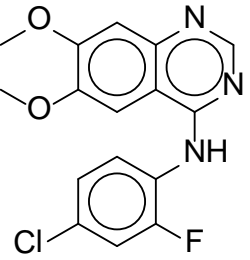

Granule count:  $IC_{50} = 0.67 \text{ } 0.2 \text{ } \mu\text{M}$   
Nuclei count:  $IC_{50} > 10 \text{ } \mu\text{M}$

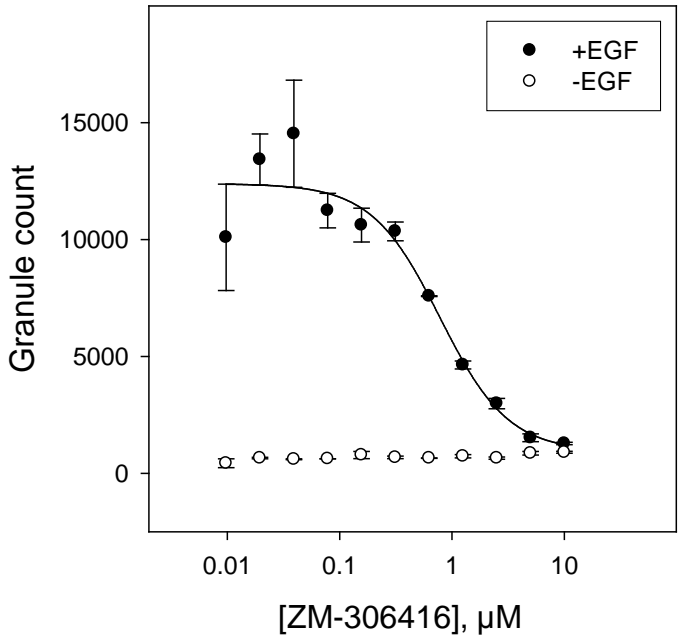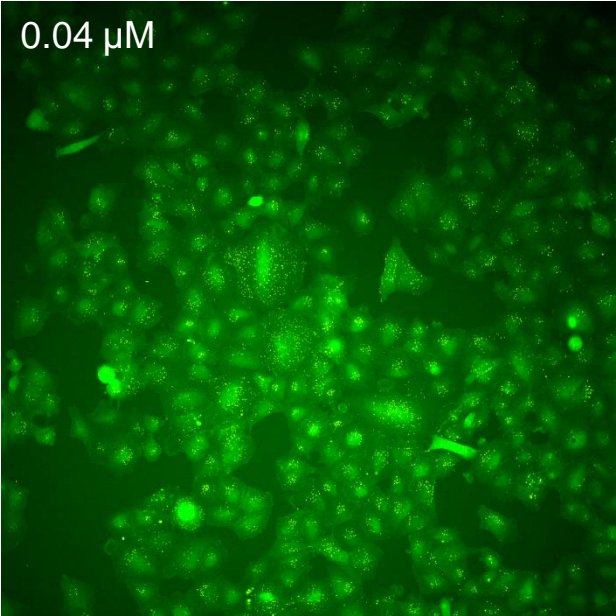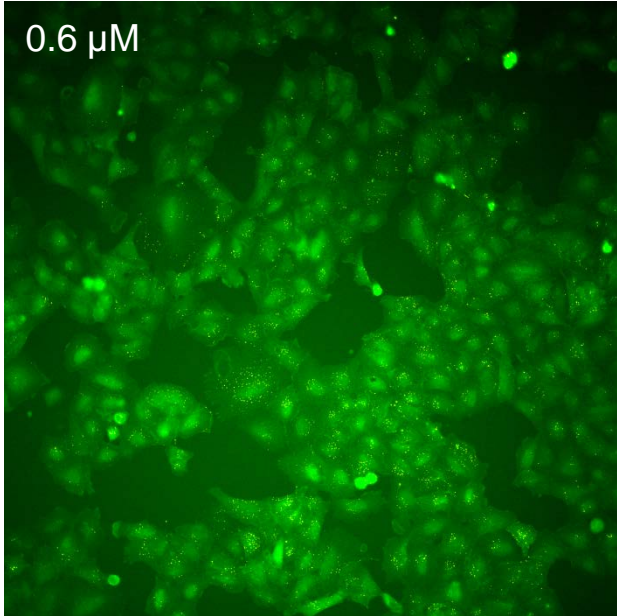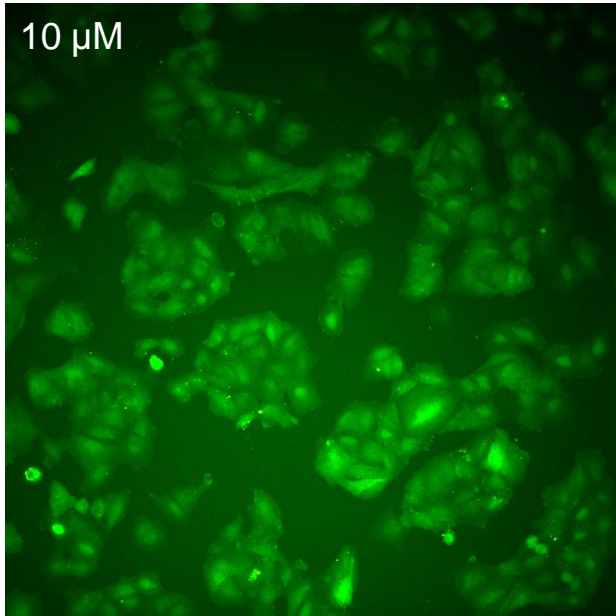

**B**

### Flurandrenolide

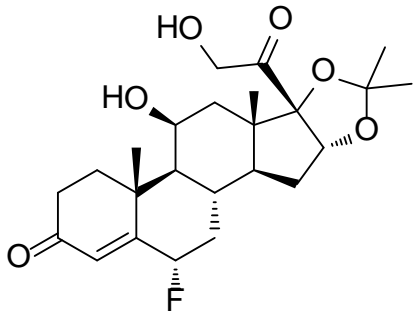

Granule count:  $EC_{50} = 0.023$   $0.02 \mu\text{M}$   
Nuclei count:  $IC_{50} > 10 \mu\text{M}$

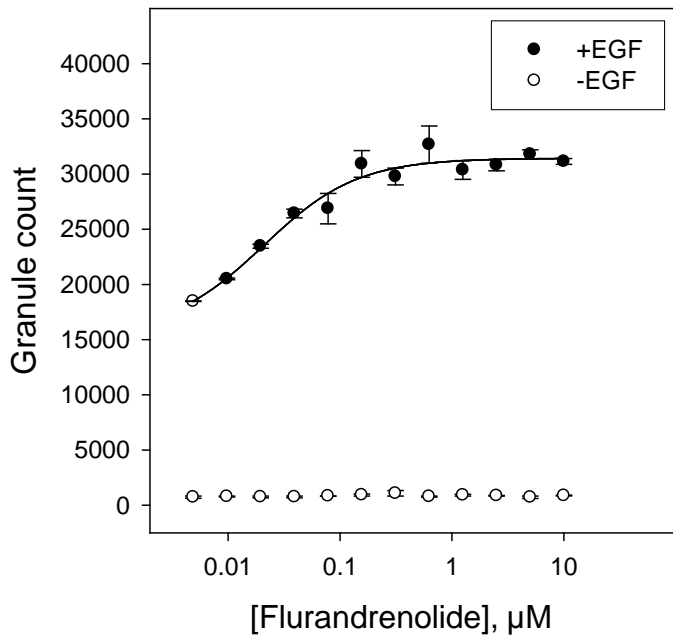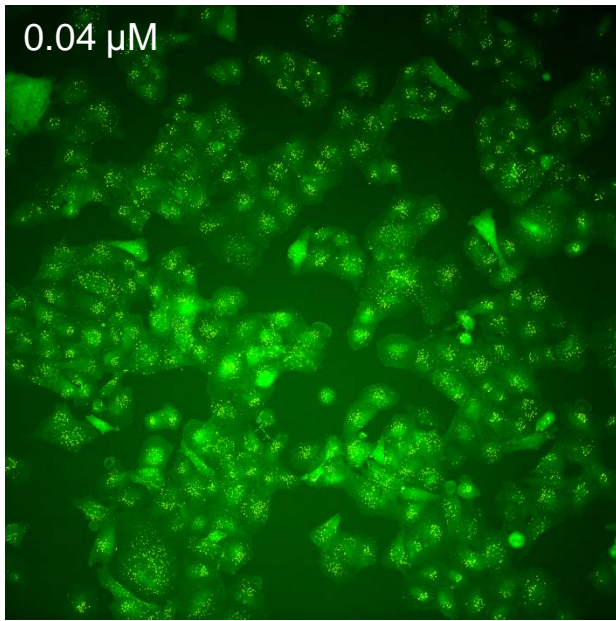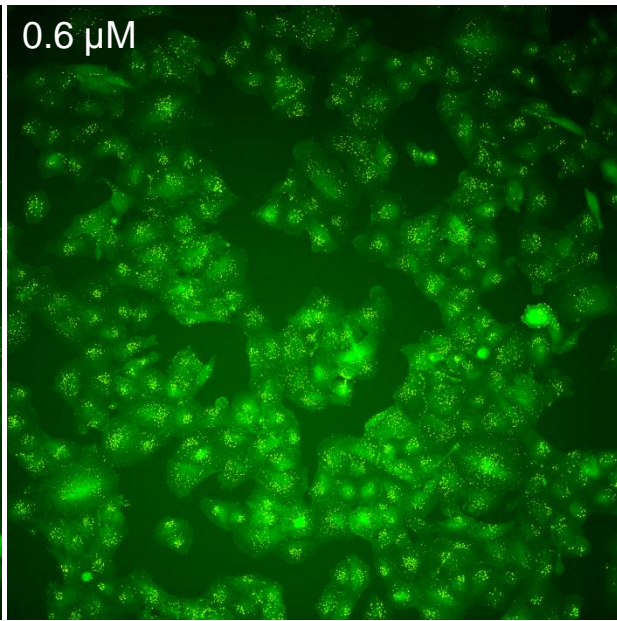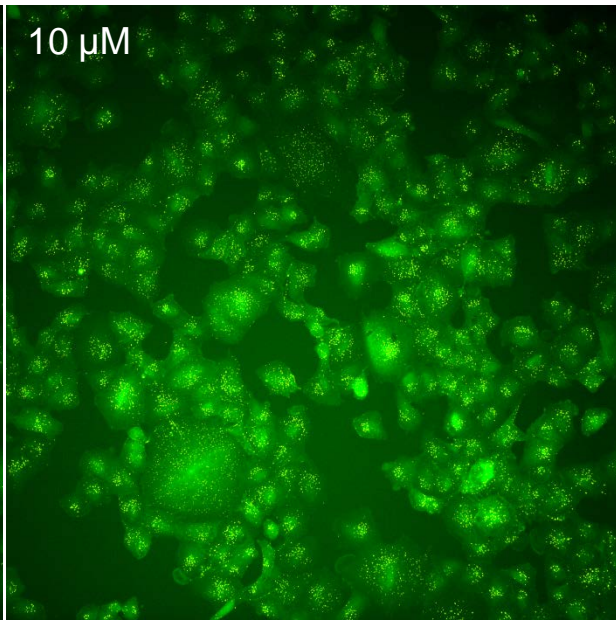



| Compound name                            | Supplier                  | resupplied | confirmed | O.I. | sol.    | Biological property                  | HTS %<br>GRAN | HTS %<br>NUC |
|------------------------------------------|---------------------------|------------|-----------|------|---------|--------------------------------------|---------------|--------------|
| Erlotinib mesylate                       | Sequoia Research Products | yes        | yes       | no   | > 10 µM | EGFR kinase inhibitor                | 69            | 14           |
| Gefitinib                                | LC Laboratories           | yes        | yes       | no   | > 10 µM | EGFR kinase inhibitor                | 62            | 12           |
| Lapatinib                                | LC Laboratories           | yes        | yes       | no   | > 10 µM | EGFR kinase inhibitor                | 98            | 34           |
| PD 153035                                | Biaffin GmbH              | yes        | yes       | no   | > 10 µM | EGFR kinase inhibitor                | 88            | 49           |
| GW 2974                                  | Sigma-Aldrich             | yes        | yes       | no   | > 10 µM | EGFR kinase inhibitor                | 84            | 20           |
| Tyrphostin AG 1478                       | Sigma-Aldrich             | yes        | yes       | no   | > 10 µM | EGFR kinase inhibitor                | 65            | 30           |
| BIBU 1361 dihydrochloride                | Toocris Bioscience        | yes        | yes       | no   | > 10 µM | EGFR kinase inhibitor                | 63            | 5            |
| GW 583340 dihydrochloride                | Toocris Bioscience        | yes        | yes       | no   | > 10 µM | EGFR kinase inhibitor                | 62            | 22           |
| ZM-306416 hydrochloride                  | Toocris Bioscience        | yes        | yes       | no   | > 10 µM | VEGFR tyrosine kinase inhibitor      | 84            | 47           |
| PKC412                                   | LC Laboratories           | yes        | yes       | no   | > 10 µM | Tyrosine kinase inhibitor            | 68            | 43           |
| Aminopurvalanol A                        | Toocris Bioscience        | yes        | yes       | no   | > 10 µM | Cyclin-dependent kinase inhibitor    | 77            | 46           |
| 17-DMAG hydrochloride                    | LC Laboratories           | yes        | yes       | no   | > 10 µM | Hsp90 inhibitor                      | 61            | 31           |
| Camptothecin                             | Prestwick Chemicals       | yes        | yes       | no   | > 10 µM | DNA topoisomerase inhibitor          | 92            | 22           |
| Bromothioetrazole                        | Internal Supplier         | yes        | no        | no   | > 10 µM | Unknown                              | 62            | 18           |
| Fuopyrroledione                          | Internal Supplier         | yes        | no        | no   | > 10 µM | Unknown                              | 67            | 33           |
| N-Boc-L-valine                           | Internal Supplier         | yes        | no        | no   | > 10 µM | Unknown                              | 78            | 41           |
| Cyclopentylphenylpyrimidinylamine        | Sigma-Aldrich             | yes        | no        | no   | > 10 µM | Lck tyrosine kinase inhibitor        | 96            | 14           |
| BAY 61-3606 hydrochloride hydrate        | Sigma-Aldrich             | yes        | no        | no   | > 10 µM | Syk inhibitor                        | 97            | 11           |
| BIO                                      | Sigma-Aldrich             | yes        | no        | no   | > 10 µM | ATP-competitive GSK-3α/β inhibitor   | 82            | 15           |
| Diacylglycerol Kinase Inhibitor II       | Sigma-Aldrich             | yes        | no        | no   | > 10 µM | Diacylglycerol kinase inhibitor      | 68            | 22           |
| Naloxone hydrochloride                   | Sigma-Aldrich             | yes        | no        | no   | > 10 µM | Opioid antagonist                    | 87            | 48           |
| Parthenolide                             | Sigma-Aldrich             | yes        | no        | no   | > 10 µM | Antiproliferative agent              | 83            | 50           |
| TBBz                                     | Sigma-Aldrich             | yes        | no        | no   | > 10 µM | CK2 inhibitor                        | 63            | 32           |
| GW 1929                                  | Toocris Bioscience        | yes        | no        | no   | > 10 µM | PPARγ agonist                        | 70            | 26           |
| INCA-6                                   | Toocris Bioscience        | yes        | no        | no   | > 10 µM | Calcineurin-NFAT signaling inhibitor | 64            | 12           |
| CCT 018159                               | Toocris Bioscience        | yes        | no        | no   | > 10 µM | Hsp90 inhibitor                      | 82            | 15           |
| 17-AAG                                   | LC Laboratories           | no         | N/A       | no   | > 10 µM | Hsp90 inhibitor                      | 65            | 27           |
| Geldanamycin                             | Sequoia Research Products | no         | N/A       | no   | > 10 µM | Hsp90 inhibitor                      | 94            | 31           |
| Tyrphostin AG 1478 hydrochloride         | Toocris Bioscience        | no         | N/A       | no   | > 10 µM | EGFR kinase inhibitor                | 98            | 3            |
| PD 153035 hydrochloride                  | Toocris Bioscience        | no         | N/A       | no   | > 10 µM | EGFR kinase inhibitor                | 65            | 47           |
| BIBX 1382 dihydrochloride                | Toocris Bioscience        | no         | N/A       | no   | > 10 µM | EGFR kinase inhibitor                | 69            | 6            |
| PD 158780                                | Toocris Bioscience        | no         | N/A       | no   | > 10 µM | EGFR kinase inhibitor                | 62            | 34           |
| Camptothecin                             | MicroSource               | no         | N/A       | no   | > 10 µM | DNA topoisomerase inhibitor          | 62            | 36           |
| Camptothecin                             | Toocris Bioscience        | no         | N/A       | no   | > 10 µM | DNA topoisomerase inhibitor          | 69            | 33           |
| 10-Hydroxycamptothecin                   | MicroSource               | no         | N/A       | no   | > 10 µM | DNA topoisomerase inhibitor          | 81            | 38           |
| SN 38                                    | Toocris Bioscience        | no         | N/A       | no   | > 10 µM | DNA topoisomerase inhibitor          | 74            | 23           |
| Mitoxantrone dihydrochloride             | Prestwick Chemicals       | no         | N/A       | no   | > 10 µM | DNA topoisomerase inhibitor          | 66            | 28           |
| Teniposide                               | MicroSource               | no         | N/A       | no   | > 10 µM | DNA topoisomerase inhibitor          | 68            | 47           |
| Cycloheximide                            | MicroSource               | no         | N/A       | no   | > 10 µM | Protein synthesis inhibitor          | 92            | 2            |
| Cycloheximide                            | Prestwick Chemicals       | no         | N/A       | no   | > 10 µM | Protein synthesis inhibitor          | 92            | 32           |
| Emetine                                  | MicroSource               | no         | N/A       | no   | > 10 µM | Protein synthesis inhibitor          | 91            | 5            |
| Emetine dihydrochloride                  | Prestwick Chemicals       | no         | N/A       | no   | > 10 µM | Protein synthesis inhibitor          | 63            | 46           |
| Emetine dihydrochloride hydrate          | Sigma-Aldrich             | no         | N/A       | no   | > 10 µM | Protein synthesis inhibitor          | 68            | 39           |
| Lycorine                                 | MicroSource               | no         | N/A       | no   | > 10 µM | Protein synthesis inhibitor          | 87            | 47           |
| Lycorine hydrochloride                   | Prestwick Chemicals       | no         | N/A       | no   | > 10 µM | Protein synthesis inhibitor          | 62            | 42           |
| Tetrahydrobenzopyrimidinamine            | Internal Supplier         | no         | N/A       | no   | > 10 µM | Unknown                              | 64            | 29           |
| Tetrahydrobenzothienopyrimidinamine      | Internal Supplier         | no         | N/A       | no   | > 10 µM | Unknown                              | 76            | 43           |
| Tetrahydropyrandiyl diacetate            | Internal Supplier         | no         | N/A       | no   | > 10 µM | Unknown                              | 75            | 36           |
| Tetrahydrotolylbenzothienopyrimidinamine | Internal Supplier         | no         | N/A       | no   | > 10 µM | Unknown                              | 82            | 47           |
| Atracurium besylate                      | Sequoia Research Products | no         | N/A       | no   | > 10 µM | Acetylcholine receptor blocker       | 79            | 49           |
| 5-Iodotubercidin                         | Biaffin GmbH              | no         | N/A       | no   | > 10 µM | Adenosine kinase inhibitor           | 91            | 39           |
| Pifithrin-µ                              | Toocris Bioscience        | no         | N/A       | no   | > 10 µM | Antiapoptotic agent                  | 79            | 42           |
| Acrisorcin                               | MicroSource               | no         | N/A       | no   | > 10 µM | Antimicrobial                        | 66            | 41           |
| Resorcinol                               | MicroSource               | no         | N/A       | no   | > 10 µM | Antimicrobial                        | 77            | 41           |
| Parthenolide                             | Prestwick Chemicals       | no         | N/A       | no   | > 10 µM | Antiproliferative agent              | 70            | 42           |
| Andrographolide                          | MicroSource               | no         | N/A       | no   | > 10 µM | Diterpenoid lactone                  | 63            | 44           |
| Sulpiride                                | Prestwick Chemicals       | no         | N/A       | no   | > 10 µM | Dopamine receptor antagonist         | 71            | 49           |
| Rhoifolin                                | MicroSource               | no         | N/A       | no   | > 10 µM | Flavonoid                            | 65            | 9            |
| Tracazolate                              | Sigma-Aldrich             | no         | N/A       | no   | > 10 µM | GABA receptor modulator, anxiolytic  | 61            | 9            |
| Scriptaid                                | Toocris Bioscience        | no         | N/A       | no   | > 10 µM | Histone deacetylase inhibitor        | 62            | 11           |
| Crassin acetate                          | MicroSource               | no         | N/A       | no   | > 10 µM | HO-1 inducer                         | 61            | 25           |
| Doxorubicin hydrochloride                | Prestwick Chemicals       | no         | N/A       | no   | > 10 µM | Intercalating agent                  | 93            | 31           |
| Piperlongumine                           | Prestwick Chemicals       | no         | N/A       | no   | > 10 µM | Natural product                      | 64            | 28           |
| Pyrrolidinedithiocarbamate ammonium      | Toocris Bioscience        | no         | N/A       | no   | > 10 µM | NF-κB inhibitor                      | 91            | 0            |
| (±)-Clopidogrel hydrochloride            | Toocris Bioscience        | no         | N/A       | no   | > 10 µM | P2Y receptor antagonist              | 66            | 39           |
| Paradichlorobenzene                      | MicroSource               | no         | N/A       | no   | > 10 µM | Pesticide                            | 91            | 42           |
| Bortezomib                               | LC Laboratories           | no         | N/A       | no   | > 10 µM | Proteasome inhibitor                 | 94            | 25           |
| Meclofenamic acid                        | Prestwick Chemicals       | no         | N/A       | no   | > 10 µM | Prostaglandin synthesis inhibitor    | 97            | 21           |
| Venlafaxine                              | MicroSource               | no         | N/A       | no   | > 10 µM | Serotonin reuptake inhibitor         | 89            | 17           |
| Alosetron hydrochloride                  | Sequoia Research Products | no         | N/A       | no   | > 10 µM | Serotonin receptor antagonist        | 68            | 44           |
| BNTX maleate                             | Toocris Bioscience        | no         | N/A       | no   | > 10 µM | Opioid receptor antagonist           | 62            | 39           |
| Guggulsterone                            | Toocris Bioscience        | no         | N/A       | no   | > 10 µM | Steroid receptor antagonist          | 83            | 44           |
| Cephaeline                               | Prestwick Chemicals       | no         | N/A       | no   | > 10 µM | Emetic                               | 69            | 26           |
| Pyrrromycin                              | MicroSource               | no         | N/A       | no   | > 10 µM | Antiproliferative agent              | 83            | 46           |
| Triptonide                               | MicroSource               | no         | N/A       | no   | > 10 µM | Natural product                      | 67            | 45           |
| Benzylmethylindolacetamide               | Internal Supplier         | no         | N/A       | no   | > 10 µM | Unknown                              | 64            | 35           |
| Dimethylpentanoic acid methyl ester      | Internal Supplier         | no         | N/A       | no   | > 10 µM | Unknown                              | 90            | 48           |
| Nitrophenylpyrazole                      | Internal Supplier         | no         | N/A       | no   | > 10 µM | Unknown                              | 73            | 38           |
| N/A                                      | Internal Supplier         | no         | N/A       | no   | > 10 µM | Unknown                              | 73            | 27           |
| N/A                                      | Internal Supplier         | no         | N/A       | no   | > 10 µM | Unknown                              | 77            | 36           |
| N/A                                      | Internal Supplier         | no         | N/A       | no   | > 10 µM | Unknown                              | 94            | 12           |
| N/A                                      | Internal Supplier         | no         | N/A       | no   | > 10 µM | Unknown                              | 67            | 27           |

Suppl. Table 1 – Antczak et al.



| Compound name                        | Supplier                  | resupplied | confirmed | O.I. | sol.    | Biological property                   | HTS %<br>GRAN | HTS %<br>NUC |
|--------------------------------------|---------------------------|------------|-----------|------|---------|---------------------------------------|---------------|--------------|
| Flurandrenolide                      | Prestwick Chemicals       | yes        | yes       | no   | > 10 µM | Corticosteroid                        | -106          | 10           |
| Beclomethasone                       | Sigma-Aldrich             | yes        | yes       | no   | > 10 µM | Corticosteroid                        | -111          | 8            |
| Ebastine                             | Sigma-Aldrich             | yes        | yes       | no   | > 10 µM | H1 receptor antagonist                | -112          | 7            |
| R-(-)-Desmethyleprenyl hydrochloride | Sigma-Aldrich             | yes        | no        | no   | > 10 µM | MAO-B inhibitor                       | -108          | 8            |
| L-allylglycine                       | Sigma-Aldrich             | yes        | no        | no   | > 10 µM | Glutamic acid decarboxylase inhibitor | -109          | 12           |
| Epiatzelechin trimethylether         | MicroSource               | yes        | no        | no   | > 10 µM | Flavonoid                             | -115          | 12           |
| Ropinirole hydrochloride             | Sigma-Aldrich             | yes        | no        | no   | > 10 µM | Dopamine receptor agonist             | -102          | 15           |
| SB 218078                            | Tocris Bioscience         | yes        | no        | yes  | > 10 µM | Chk1 kinase inhibitor                 | -107          | 28           |
| Ursocolanic acid                     | MicroSource               | yes        | no        | no   | > 10 µM | Bile acid                             | -129          | 5            |
| GBR-12935                            | Tocris Bioscience         | yes        | no        | no   | > 10 µM | Dopamine reuptake inhibitor           | -118          | 10           |
| Dicloxacillin sodium salt            | Prestwick Chemicals       | yes        | no        | no   | > 10 µM | Antibacterial                         | -137          | 7            |
| Scopoletin                           | MicroSource               | yes        | no        | no   | > 10 µM | Acetylcholinesterase inhibitor        | -117          | 13           |
| Tropisetron hydrochloride            | Tocris Bioscience         | yes        | no        | no   | > 10 µM | 5-HT receptor antagonist              | -141          | 5            |
| Nonanoic acid methyl ester           | Internal Supplier         | yes        | no        | no   | > 10 µM | Unknown                               | -118          | 3            |
| 2,6-dimethoxyquinone                 | MicroSource               | yes        | no        | no   | > 10 µM | Unknown                               | -138          | -2           |
| Flurandrenolide                      | MicroSource               | no         | N/A       | no   | > 10 µM | Corticosteroid                        | -110          | 18           |
| Beclomethasone dipropionate          | MicroSource               | no         | N/A       | no   | > 10 µM | Corticosteroid                        | -112          | 3            |
| Betamethasone 17,21-dipropionate     | MicroSource               | no         | N/A       | no   | > 10 µM | Corticosteroid                        | -145          | 17           |
| Clobetasol propionate                | Prestwick Chemicals       | no         | N/A       | no   | > 10 µM | Corticosteroid                        | -138          | 7            |
| Clobetasol propionate                | Sequoia Research Products | no         | N/A       | no   | > 10 µM | Corticosteroid                        | -120          | 8            |
| Dexamethasone                        | MicroSource               | no         | N/A       | no   | > 10 µM | Corticosteroid                        | -100          | 6            |
| Dexamethasone                        | Tocris Bioscience         | no         | N/A       | no   | > 10 µM | Corticosteroid                        | -113          | -1           |
| Dexamethasone                        | Prestwick Chemicals       | no         | N/A       | no   | > 10 µM | Corticosteroid                        | -114          | 6            |
| Hydrocortisone base                  | Prestwick Chemicals       | no         | N/A       | no   | > 10 µM | Corticosteroid                        | -112          | 20           |
| Hydrocortisone butyrate              | MicroSource               | no         | N/A       | no   | > 10 µM | Corticosteroid                        | -106          | 10           |
| Hydrocortisone hemisuccinate         | MicroSource               | no         | N/A       | no   | > 10 µM | Corticosteroid                        | -105          | 16           |
| Flumethasone                         | Prestwick Chemicals       | no         | N/A       | no   | > 10 µM | Corticosteroid                        | -123          | 11           |
| Flumethasone pivalate                | MicroSource               | no         | N/A       | no   | > 10 µM | Corticosteroid                        | -130          | 5            |
| Methylprednisolone, 6-alpha          | Prestwick Chemicals       | no         | N/A       | no   | > 10 µM | Corticosteroid                        | -110          | 10           |
| Prednisolone                         | MicroSource               | no         | N/A       | no   | > 10 µM | Corticosteroid                        | -132          | 4            |
| Prednisolone acetate                 | MicroSource               | no         | N/A       | no   | > 10 µM | Corticosteroid                        | -128          | 2            |
| Fluticasone propionate               | Prestwick Chemicals       | no         | N/A       | no   | > 10 µM | Corticosteroid                        | -111          | 13           |
| Fluticasone propionate               | Tocris Bioscience         | no         | N/A       | no   | > 10 µM | Corticosteroid                        | -107          | 5            |
| Fluocinonide acetonide               | MicroSource               | no         | N/A       | no   | > 10 µM | Corticosteroid                        | -116          | 2            |
| Fluocinonide                         | Prestwick Chemicals       | no         | N/A       | no   | > 10 µM | Corticosteroid                        | -130          | 1            |
| Triamcinolone                        | Prestwick Chemicals       | no         | N/A       | no   | > 10 µM | Corticosteroid                        | -116          | 15           |
| Triamcinolone acetonide              | MicroSource               | no         | N/A       | no   | > 10 µM | Corticosteroid                        | -110          | -6           |
| Clocortolone pivalate                | Prestwick Chemicals       | no         | N/A       | no   | > 10 µM | Corticosteroid                        | -121          | 12           |
| Diflucortolone pivalate              | MicroSource               | no         | N/A       | no   | > 10 µM | Corticosteroid                        | -107          | 7            |
| Fludrocortisone                      | Prestwick Chemicals       | no         | N/A       | no   | > 10 µM | Corticosteroid                        | -163          | 2            |
| Flunisolide                          | Prestwick Chemicals       | no         | N/A       | no   | > 10 µM | Corticosteroid                        | -129          | 8            |
| Halcinonide                          | Prestwick Chemicals       | no         | N/A       | no   | > 10 µM | Corticosteroid                        | -100          | 11           |
| Rimexolone                           | Prestwick Chemicals       | no         | N/A       | no   | > 10 µM | Corticosteroid                        | -105          | 9            |
| Triflupromazine hydrochloride        | MicroSource               | no         | N/A       | no   | > 10 µM | Dopamine receptor antagonist          | -124          | 4            |
| ltopride hydrochloride               | Sequoia Research Products | no         | N/A       | no   | > 10 µM | Dopamine receptor antagonist          | -103          | 13           |
| Trihexyphenidyl                      | Prestwick Chemicals       | no         | N/A       | no   | > 10 µM | Muscarinic receptor ligand            | -113          | 5            |
| Isamoltane hemifumarate              | Tocris Bioscience         | no         | N/A       | no   | > 10 µM | 5-HT receptor antagonist              | -105          | 9            |
| Cisplatin                            | Tocris Bioscience         | no         | N/A       | no   | > 10 µM | Alkylating agent                      | -101          | 13           |
| Cefamandole sodium                   | MicroSource               | no         | N/A       | no   | > 10 µM | Antibacterial                         | -106          | 8            |
| Chloramphenicol hemisuccinate        | MicroSource               | no         | N/A       | no   | > 10 µM | Antimicrobial                         | -101          | 13           |
| Merbromin                            | MicroSource               | no         | N/A       | no   | > 10 µM | Antimicrobial                         | -165          | 7            |
| Ketoconazole                         | Tocris Bioscience         | no         | N/A       | no   | > 10 µM | Antifungal                            | -121          | 6            |
| AFMK                                 | Sigma-Aldrich             | no         | N/A       | no   | > 10 µM | Antioxidant                           | -119          | 8            |
| Mesna                                | Prestwick Chemicals       | no         | N/A       | no   | > 10 µM | Antioxidant                           | -105          | 8            |
| Isradipine                           | Prestwick Chemicals       | no         | N/A       | no   | > 10 µM | Calcium channel blocker               | -104          | 18           |
| GW 405833                            | Tocris Bioscience         | no         | N/A       | no   | > 10 µM | CB2 receptor agonist                  | -101          | 12           |
| RS 504393                            | Tocris Bioscience         | no         | N/A       | no   | > 10 µM | CCR2 chemokine receptor antagonist    | -116          | 13           |
| Purvalanol B                         | Tocris Bioscience         | no         | N/A       | no   | > 10 µM | Cyclin-dependent kinase inhibitor     | -112          | 5            |
| Clozapine                            | MicroSource               | no         | N/A       | no   | > 10 µM | Ion channel inhibitor                 | -121          | 9            |
| 5,7-dihydroxyisoflavone              | MicroSource               | no         | N/A       | no   | > 10 µM | Isoflavonoid                          | -115          | 5            |
| T 0901317                            | Tocris Bioscience         | no         | N/A       | no   | > 10 µM | Liver X receptor (LXR) agonist        | -103          | 9            |
| Luzindole                            | Tocris Bioscience         | no         | N/A       | no   | > 10 µM | Melatonin receptor antagonist         | -138          | -1           |
| Aminohippuric acid                   | Prestwick Chemicals       | no         | N/A       | no   | > 10 µM | Metabolite                            | -101          | 8            |
| Dihydrofolic acid                    | MicroSource               | no         | N/A       | no   | > 10 µM | Nucleic acid precursor                | -108          | 8            |
| 1-Aminocyclobutane carboxylic acid   | MicroSource               | no         | N/A       | no   | > 10 µM | Unknown                               | -116          | -1           |
| Carbonic acid ester phenyl ester     | Internal Supplier         | no         | N/A       | no   | > 10 µM | Unknown                               | -109          | 17           |

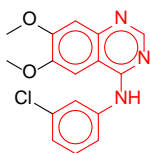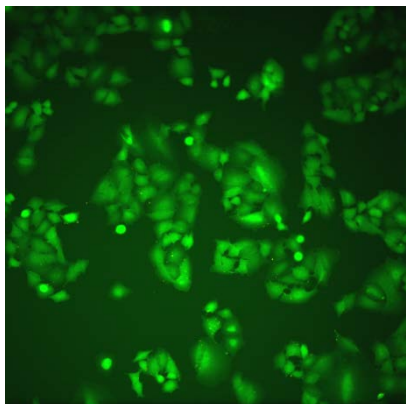

| <b>tyrphostin AG 1478</b> | HTS %I      | IC <sub>50</sub> , μM |
|---------------------------|-------------|-----------------------|
| granule count             | 94          | 0.065±0.008           |
| nuclei count              | 12          | > 10                  |
| molecular target          | EGFR kinase |                       |

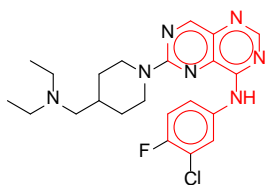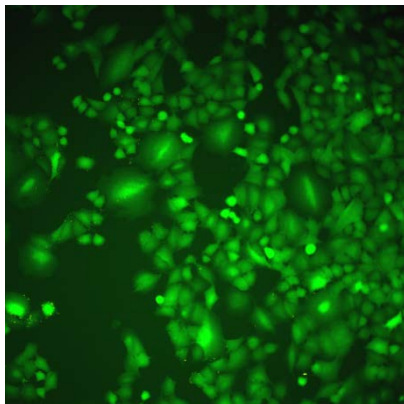

| <b>BIBU 1361</b> | HTS %I      | IC <sub>50</sub> , μM |
|------------------|-------------|-----------------------|
| granule count    | 98          | 0.038±0.007           |
| nuclei count     | 3           | > 10                  |
| molecular target | EGFR kinase |                       |

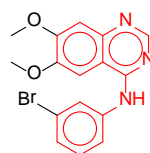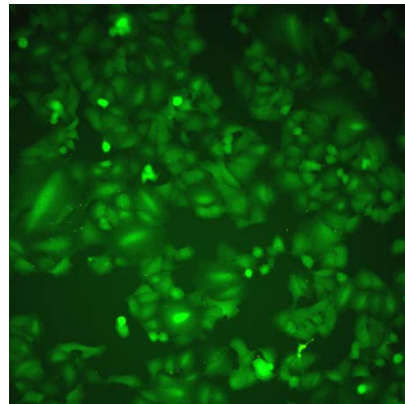

| <b>PD 153035</b> | HTS %I      | IC <sub>50</sub> , μM |
|------------------|-------------|-----------------------|
| granule count    | 97          | 0.091±0.02            |
| nuclei count     | 12          | > 10                  |
| molecular target | EGFR kinase |                       |

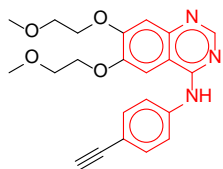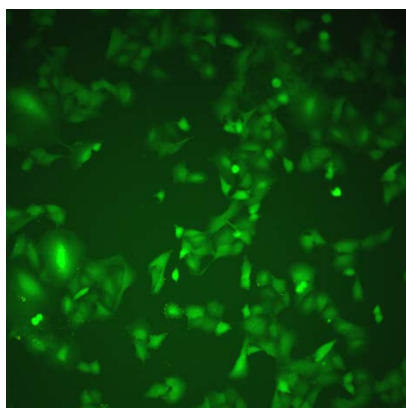

| <b>erlotinib</b> | HTS %I      | IC <sub>50</sub> , μM |
|------------------|-------------|-----------------------|
| granule count    | 98          | 0.21±0.03             |
| nuclei count     | 36          | > 10                  |
| molecular target | EGFR kinase |                       |

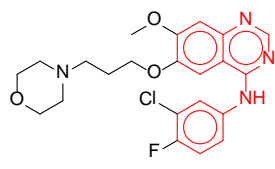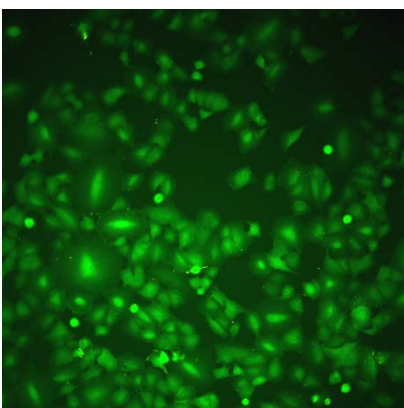

| <b>gefitinib</b> | HTS %I      | IC <sub>50</sub> , μM |
|------------------|-------------|-----------------------|
| granule count    | 91          | 0.38±0.04             |
| nuclei count     | 5           | > 10                  |
| molecular target | EGFR kinase |                       |

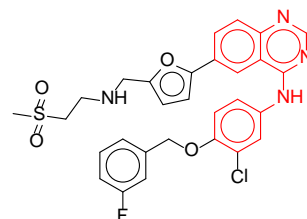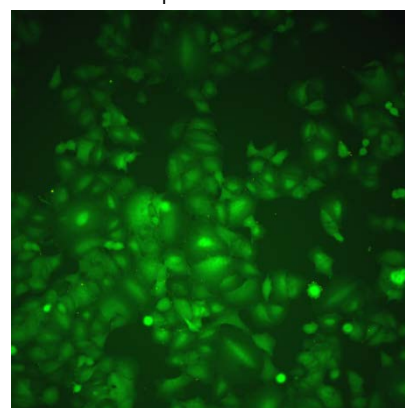

| <b>lapatinib</b> | HTS %I      | IC <sub>50</sub> , μM |
|------------------|-------------|-----------------------|
| granule count    | 91          | 0.59±0.03             |
| nuclei count     | 0           | > 10                  |
| molecular target | EGFR kinase |                       |

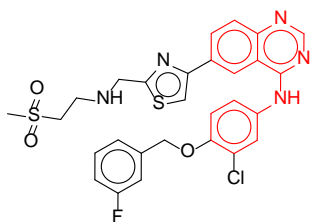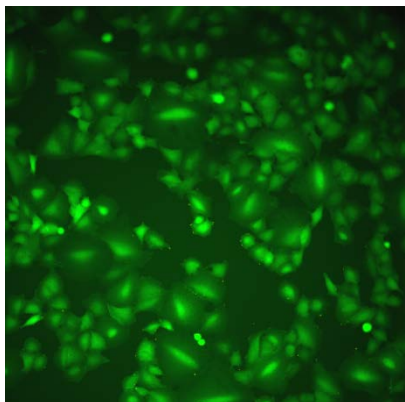

| GW 583340        | HTS %I      | IC <sub>50</sub> , μM |
|------------------|-------------|-----------------------|
| granule count    | 94          | 2.0±0.4               |
| nuclei count     | 26          | > 10                  |
| molecular target | EGFR kinase |                       |

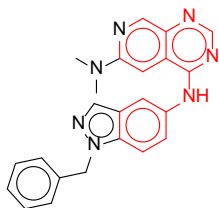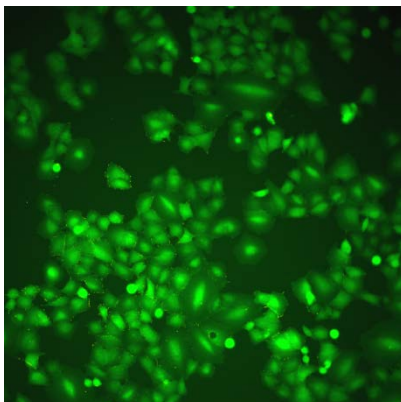

| GW 2974          | HTS %I      | IC <sub>50</sub> , μM |
|------------------|-------------|-----------------------|
| granule count    | 89          | 1.3±0.5               |
| nuclei count     | 18          | > 10                  |
| molecular target | EGFR kinase |                       |

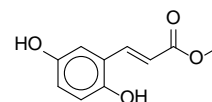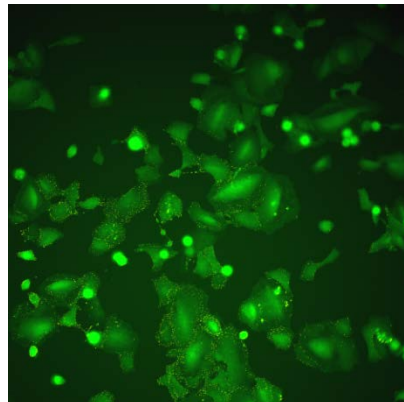

| erbstatin analog | HTS %I      | IC <sub>50</sub> , μM |
|------------------|-------------|-----------------------|
| granule count    | -24         | > 10                  |
| nuclei count     | 2           | 2.3                   |
| molecular target | EGFR kinase |                       |

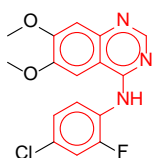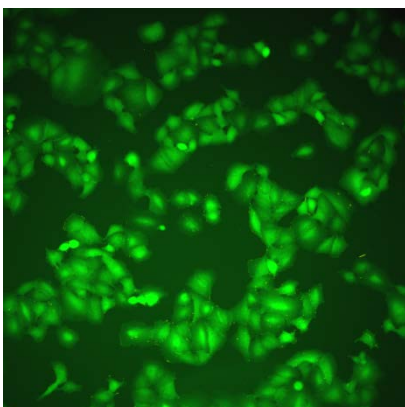

| ZM 306416        | HTS %I       | IC <sub>50</sub> , μM |
|------------------|--------------|-----------------------|
| granule count    | 97           | 0.67±0.2              |
| nuclei count     | 21           | > 10                  |
| molecular target | VEGFR kinase |                       |

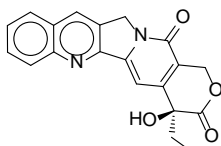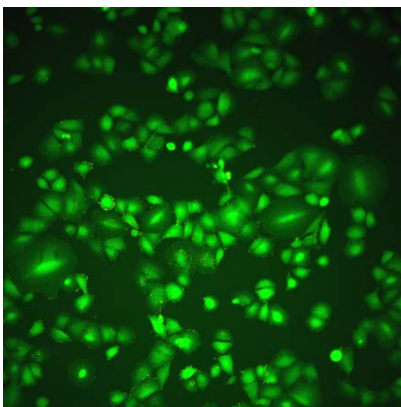

| camptothecin     | HTS %I          | IC <sub>50</sub> , μM |
|------------------|-----------------|-----------------------|
| granule count    | 81              | 0.72±0.1              |
| nuclei count     | 40              | > 10                  |
| molecular target | topoisomerase I |                       |

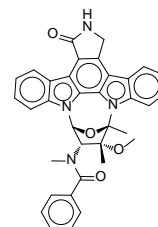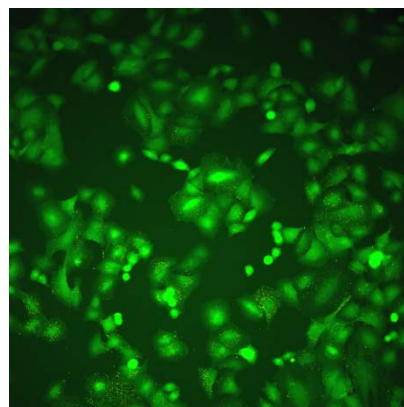

| PKC 412          | HTS %I               | IC <sub>50</sub> , μM |
|------------------|----------------------|-----------------------|
| granule count    | 68                   | 1.3±0.7               |
| nuclei count     | 35                   | > 10                  |
| molecular target | pan-kinase inhibitor |                       |

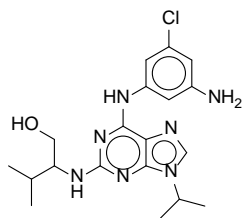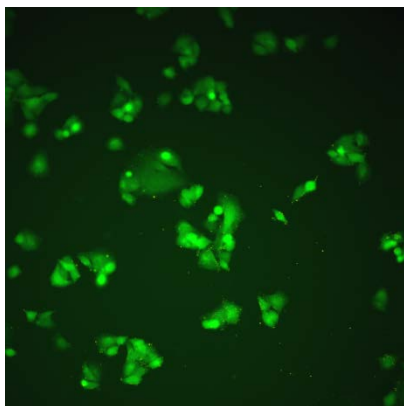

| aminopurvalanol A | HTS %I | IC <sub>50</sub> , μM |
|-------------------|--------|-----------------------|
| granule count     | 62     | 0.91±0.4              |
| nuclei count      | 40     | 7.7                   |
| molecular target  | CDKs   |                       |

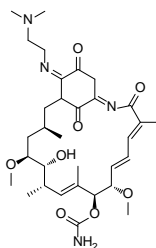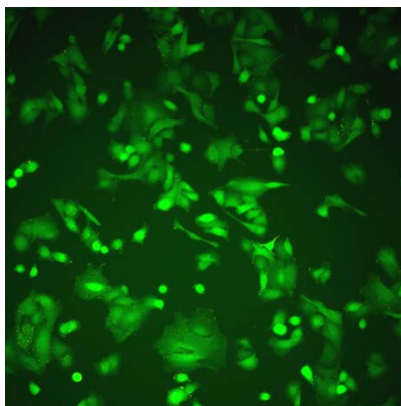

| 17-DMAG          | HTS %I | IC <sub>50</sub> , μM |
|------------------|--------|-----------------------|
| granule count    | 92     | 0.029±0.003           |
| nuclei count     | 33     | > 10                  |
| molecular target | Hsp90  |                       |

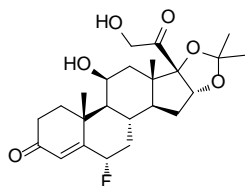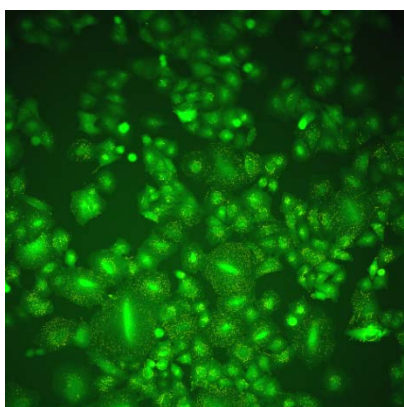

| flurandrenolide  | HTS %I  | EC <sub>50</sub> , μM |
|------------------|---------|-----------------------|
| granule count    | -165    | 0.023±0.02            |
| nuclei count     | 7       | > 10                  |
| molecular target | steroid |                       |

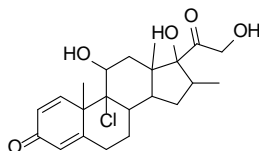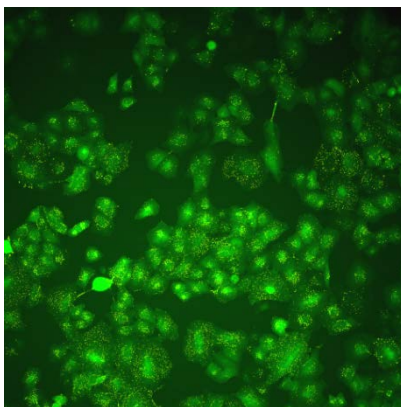

| beclomethasone   | HTS %I         | EC <sub>50</sub> , μM |
|------------------|----------------|-----------------------|
| granule count    | -116           | 0.042±0.007           |
| nuclei count     | 16             | > 10                  |
| molecular target | glucocorticoid |                       |

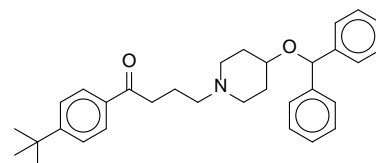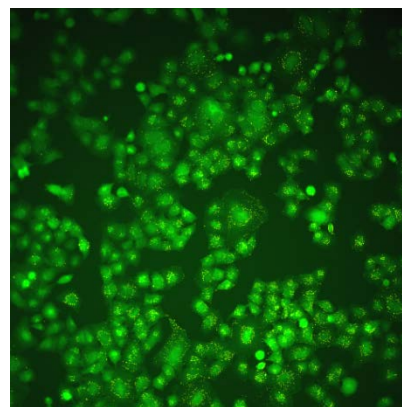

| ebastine         | HTS %I      | EC <sub>50</sub> , μM |
|------------------|-------------|-----------------------|
| granule count    | -110        | 1.5±0.3               |
| nuclei count     | 6           | > 10                  |
| molecular target | H1 receptor |                       |
